# Supplementary material for: Regulatory T and B cells in pediatric Henoch–Schönlein purpura: friends or foes?
Source: Springer Nature journal article supplement (doi:10.1186/s13075-024-03278-w), 2024-02-16
Supplement: MOESM1 [file 13075_2024_3278_MOESM1_ESM.pdf]

**Supplementary data. Table 1. Biological data, Groups A, B and C**

| Group                                              | A                     | B                     | C                    | Global p value   | Holm adjusted p value |               |                  |
|----------------------------------------------------|-----------------------|-----------------------|----------------------|------------------|-----------------------|---------------|------------------|
|                                                    |                       |                       |                      |                  | A vs B                | A vs C        | B vs C           |
| Number of subjects                                 | 30                    | 30                    | 40                   |                  |                       |               |                  |
| % Tregs (3/1/4) <sup>#</sup>                       | 6.53 [4.24;9.21]      | 4.33 [3.6;5.66]       | 4.45 [3.01;6.6]      | <b>0.0049</b>    | <b>0.0049</b>         | <b>0.0016</b> | <b>0.0029</b>    |
| Tregs/mm <sup>3</sup> (4/4/8) <sup>#</sup>         | 50.01 [35.09;84.48]   | 50.53 [29.1;68.44]    | 39.44 [20.95;73.82]  | 0.3871           | 0.3871                | 0.4678        | 0.3192           |
| % Bregs (11/6/17) <sup>#</sup>                     | 6.47 [5.34 ; 8.70]    | 5.86 [4.45 ; 9.27]    | 6.90 [5.53 ; 9.39]   | 0.7001           | 1.0000                | 1.0000        | 1.0000           |
| IgA (g/L) (2/0/2) <sup>#</sup>                     | 1.86 [1.6;2.25]       | 1.19 [0.99;1.77]      | 0.95 [0.62;1.33]     | <b>&lt;0.001</b> | <b>&lt;0.001</b>      | <b>0.0096</b> | <b>&lt;0.001</b> |
| IgG (g/L) (2/0/3) <sup>#</sup>                     | 10.17 [7.62;12.38]    | 8.88 [7.34;10.46]     | 7.85 [6.44;10.59]    | 0.07             | 0.0771                | 0.3206        | 0.0631           |
| IgM (g/L) (2/0/2) <sup>#</sup>                     | 0.89 [0.66;0.99]      | 0.86 [0.65;1.11]      | 0.82 [0.69;1.12]     | 0.98             | 0.9760                | 1.0000        | 1.0000           |
| Sum of IgA, IgG and IgM (g/L) (2/0/3) <sup>#</sup> | 12.81 [9.71;16.33]    | 10.94 [9.55;13.64]    | 9.61 [8.27;12.64]    | <b>0.02</b>      | <b>0.0179</b>         | 0.1575        | <b>0.0133</b>    |
| IL-1-beta (pg/ml) (4/1/2) <sup>#</sup>             | 51.47 [19.11;79.26]   | 42.81 [23.15;98.97]   | 27.12 [17.49;42.14]  | <b>0.05</b>      | 0.0512                | 0.9339        | 0.9339           |
| IL-10 (pg/ml) (4/1/2) <sup>#</sup>                 | 12.32 [3.86;23.33]    | 6.36 [2.95;22.68]     | 4.59 [2.76;10.1]     | 0.09             | 0.0889                | 0.4032        | 0.0291           |
| IL-17A (pg/ml) (4/1/2) <sup>#</sup>                | 37.16 [9.21;64.5]     | 18.47 [7.84;43.7]     | 12.66 [7.74;31]      | <b>0.04</b>      | <b>0.0421</b>         | 0.5143        | <b>0.0139</b>    |
| IL-6 (pg/ml) (4/1/2) <sup>#</sup>                  | 101.59 [51.02;141.61] | 102.59 [57.52;188.74] | 72.39 [52.91;100.95] | 0.29             | 0.2870                | 1.0000        | 1.0000           |
| IL-8 (pg/ml) (4/1/2) <sup>#</sup>                  | 176.11 [36.23;303.28] | 100.25 [28.1;442.9]   | 39.98 [2.36;215.63]  | <b>0.05</b>      | 0.0534                | 0.7027        | 0.6547           |
| LAP (pg/ml) (4/1/2) <sup>#</sup>                   | 13.08 [9.64;22.87]    | 14.86 [11.88;20.41]   | 9.03 [3.82;13.91]    | <b>0.003</b>     | <b>0.0033</b>         | 0.7653        | <b>0.0395</b>    |
| TNF-alpha (pg/ml) (4/1/2) <sup>#</sup>             | 43.89 [27.52;70.31]   | 34.63 [24.62;63.08]   | 31.66 [23;44.73]     | 0.22             | 0.2186                | 1.0000        | 1.0000           |

Data are shown as median (interquartile range q1;q3). <sup>#</sup> Missing data respectively for n patients in Groups A, B and C.
