# Supplementary material for: Regulatory T and B cells in pediatric Henoch–Schönlein purpura: friends or foes?
Source: Springer Nature journal article supplement (doi:10.1186/s13075-024-03278-w), 2024-02-16
Supplement: MOESM2 [file 13075_2024_3278_MOESM2_ESM.pdf]

**Supplementary data. Table 2. Biological data according to whether patients have HSP nephritis or not**

| Group                                  | HSP nephritis with anatomopathological documentation | HSP nephritis with urine test diagnosis | HSP without renal involvement | Global p value | Holm adjusted p value                                                                  |                                                                                                  |                                                                           |
|----------------------------------------|------------------------------------------------------|-----------------------------------------|-------------------------------|----------------|----------------------------------------------------------------------------------------|--------------------------------------------------------------------------------------------------|---------------------------------------------------------------------------|
|                                        |                                                      |                                         |                               |                | HSP nephritis with anatomopathological documentation vs. HSP without renal involvement | HSP nephritis with anatomopathological documentation vs. HSP nephritis with urine test diagnosis | HSP nephritis with urine test diagnosis vs. HSP without renal involvement |
| Number of subjects                     | 8 <sup>a</sup>                                       | 18 <sup>a</sup>                         | 33 <sup>a</sup>               |                |                                                                                        |                                                                                                  |                                                                           |
| % Tregs(1/2/1) <sup>#</sup>            | 3.92 [3.26 ; 4.43]                                   | 5.05 [4.08 ; 8.02]                      | 5.33 [3.81;7.36]              | 0.1333         | 0.2696                                                                                 | 0.2696                                                                                           | 0.7183                                                                    |
| Tregs/mm3 (1/3/4) <sup>#</sup>         | 43.75 [38.58 ; 68.44]                                | 44.75 [35.09 ; 95.87]                   | 60.37 [32;78.65]              | 0.9350         | 1.0000                                                                                 | 1.0000                                                                                           | 1.0000                                                                    |
| % Bregs (2/6/9) <sup>#</sup>           | 4.76 [3.82 ; 7.3]                                    | 5.45 [4.80 ; 6.48]                      | 7.67 [5.73;9.80]              | 0.1009         | 0.7318                                                                                 | 0.2754                                                                                           | 0.2754                                                                    |
| IgA (g/L) (0/1/1) <sup>#</sup>         | 1.11 [0.84 ; 1.78]                                   | 1.72 [1.38 ; 2.2]                       | 1.58 [1.04;2.15]              | 0.2127         | 0.2961                                                                                 | 0.5060                                                                                           | 0.5060                                                                    |
| IgG (g/L) (0/1/1) <sup>#</sup>         | 7.46 [6.36 ; 8.65]                                   | 9.68 [7.77 ; 11.04]                     | 9.85 [8.12;11.05]             | 0.1151         | 0.2014                                                                                 | 0.2014                                                                                           | 0.6739                                                                    |
| IgM (g/L) (0/1/1) <sup>#</sup>         | 0.84 [0.63 ; 1.49]                                   | 0.91 [0.72 ; 0.99]                      | 0.85 [0.64;1.08]              | 0.8956         | 0.7385                                                                                 | 0.7385                                                                                           | 0.9055                                                                    |
| IL-1-beta (pg/ml) (1/2/2) <sup>#</sup> | 35.41 [7.45 ; 98.97]                                 | 55.4 [21.06 ; 72.34]                    | 59.63 [21.49;96.64]           | 0.5655         | 1.0000                                                                                 | 1.0000                                                                                           | 1.0000                                                                    |
| IL-10 (pg/ml) (1/2/2) <sup>#</sup>     | 6.36 [1.82 ; 34.39]                                  | 13.05 [4.12 ; 22.14]                    | 11.41 [2.95;23.33]            | 0.7923         | 1.0000                                                                                 | 1.0000                                                                                           | 1.0000                                                                    |
| IL-17A (pg/ml) (1/2/2) <sup>#</sup>    | 20.19 [5.15 ; 102.81]                                | 34.75 [9.7 ; 56.68]                     | 34.22 [7.84;64.5]             | 0.9492         | 1.0000                                                                                 | 1.0000                                                                                           | 1.0000                                                                    |
| IL-6 (pg/ml) (1/2/2) <sup>#</sup>      | 97.03 [27.04 ; 109.31]                               | 78.16 [56.02 ; 124.77]                  | 102.59 [57.52 ; 188.74]       | 0.3928         | 0.9727                                                                                 | 0.9727                                                                                           | 0.9727                                                                    |
| IL-8 (pg/ml) (1/3/3) <sup>#</sup>      | 297.57 [39.23 ; 470.9]                               | 161.46 [62.64 ; 283.31]                 | 70.58 [9.13;440.59]           | 0.3947         | 1.0000                                                                                 | 1.0000                                                                                           | 1.0000                                                                    |
| LAP (pg/ml) (1/2/2) <sup>#</sup>       | 14.86 [9.5 ; 20.42]                                  | 14.36 [10.28 ; 19.05]                   | 13.95 [9.64;19.23]            | 0.9781         | 1.0000                                                                                 | 1.0000                                                                                           | 1.0000                                                                    |
| TNF-alpha (pg/ml) (1/2/2) <sup>#</sup> | 38.12 [18.09 ; 118.56]                               | 52.98 [29.68 ; 68.26]                   | 34.63 [23.27;70.31]           | 0.7478         | 1.0000                                                                                 | 1.0000                                                                                           | 1.0000                                                                    |

Data are shown as median (interquartile range q1;q3).

<sup>a</sup> The data is missing for 1 patient, the total number of HSP in these analysis is 59 (and not 60).

<sup>#</sup> Missing data respectively for n patients in group HSP nephritis with anatomopathological documentation, HSP nephritis with urine test diagnosis, HSP without renal involvement.
