# Supplementary figures and images for: Regulatory T and B cells in pediatric Henoch–Schönlein purpura: friends or foes?
Source: Springer Nature journal article supplement (doi:10.1186/s13075-024-03278-w), 2024-02-16

Supplementary Figure 1

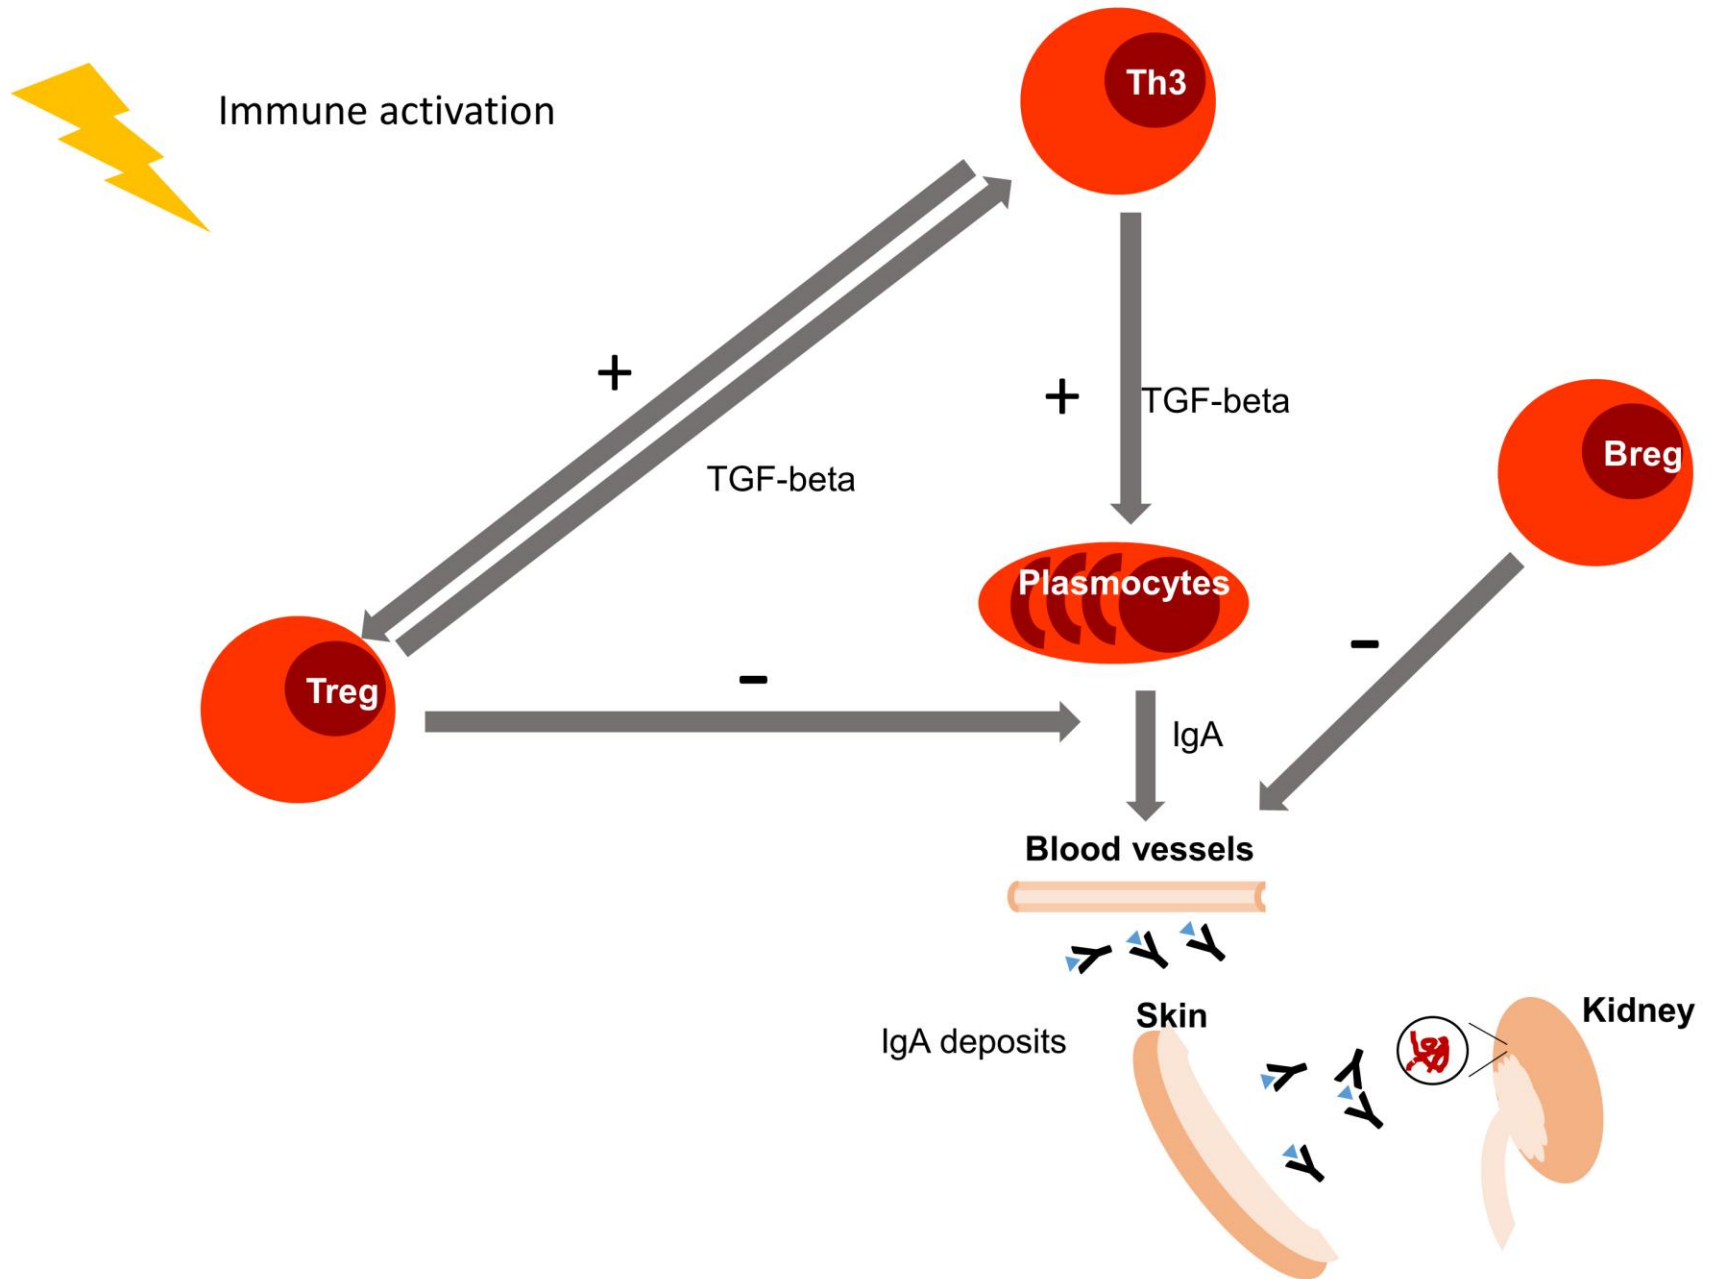

Supplement: MOESM3 [file 13075_2024_3278_MOESM3_ESM.pdf]
